# Supplementary material for: Compatible bacterial mixture, tolerant to desiccation, improves maize plant growth
Source: PubMed Central journal article supplement (PMC5678714; doi:10.1371/journal.pone.0187913), 2017-11-08
Supplement: pone.0187913.s001.pdf [file pone.0187913.s001.pdf]

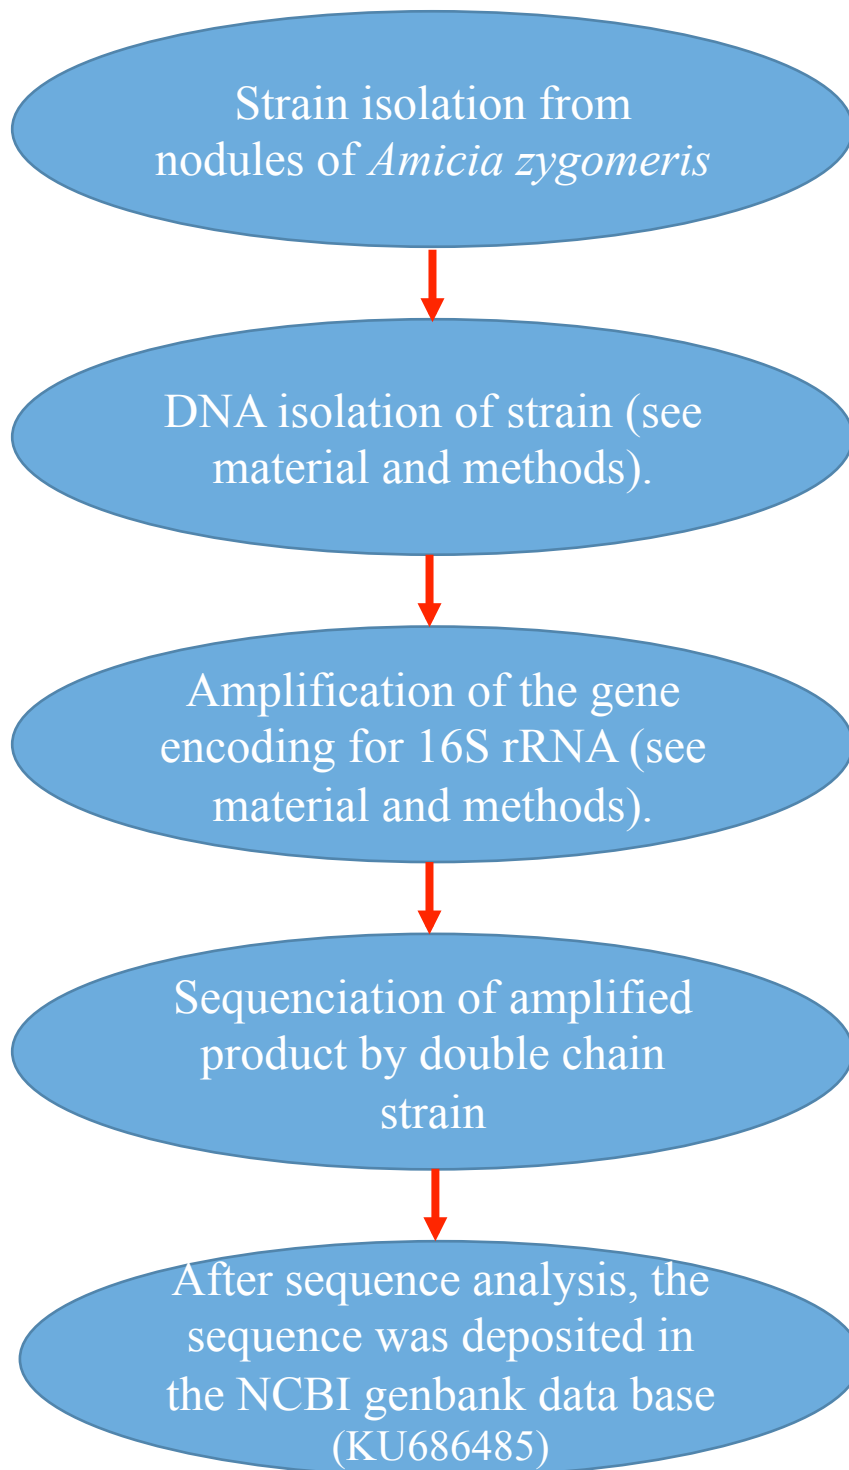

**S1 Fig. Flow-chart to illustrate the identification of *Acinetobacter* sp. EMM02 by amplification and sequencing of the gene encoding for 16S rRNA. The Genbank accession number is indicated in parenthesis.**
