# Supplementary material for: Compatible bacterial mixture, tolerant to desiccation, improves maize plant growth
Source: PubMed Central journal article supplement (PMC5678714; doi:10.1371/journal.pone.0187913), 2017-11-08
Supplement: pone.0187913.s003.pdf [file pone.0187913.s003.pdf]

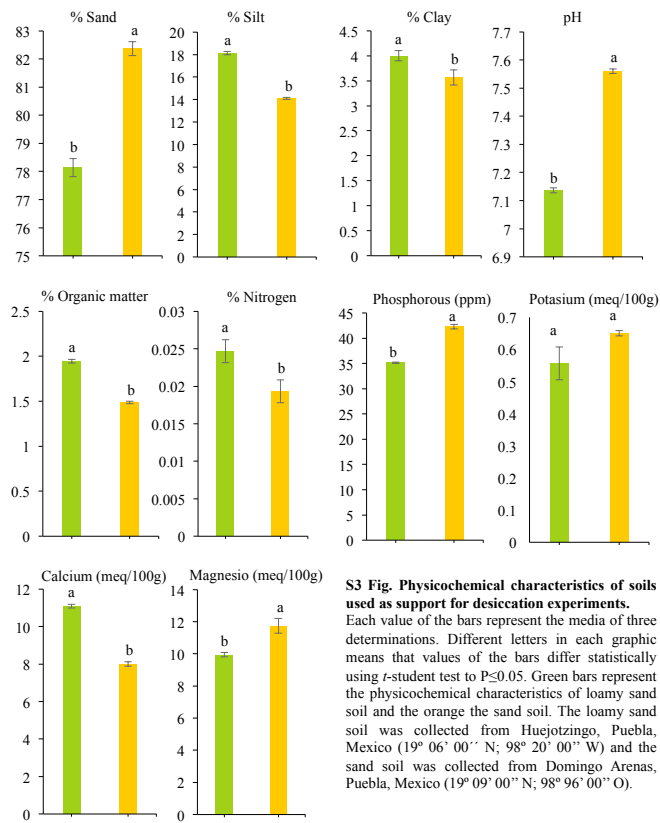

**S3 Fig. Physicochemical characteristics of soils used as support for desiccation experiments.** Each value of the bars represent the media of three determinations. Different letters in each graphic means that values of the bars differ statistically using *t*-student test to  $P \leq 0.05$ . Green bars represent the physicochemical characteristics of loamy sand soil and the orange the sand soil. The loamy sand soil was collected from Huejotzingo, Puebla, Mexico (19° 06' 00" N; 98° 20' 00" W) and the sand soil was collected from Domingo Arenas, Puebla, Mexico (19° 09' 00" N; 98° 96' 00" O).
