# Supplementary material for: Compatible bacterial mixture, tolerant to desiccation, improves maize plant growth
Source: PubMed Central journal article supplement (PMC5678714; doi:10.1371/journal.pone.0187913), 2017-11-08
Supplement: pone.0187913.s005.pdf [file pone.0187913.s005.pdf]

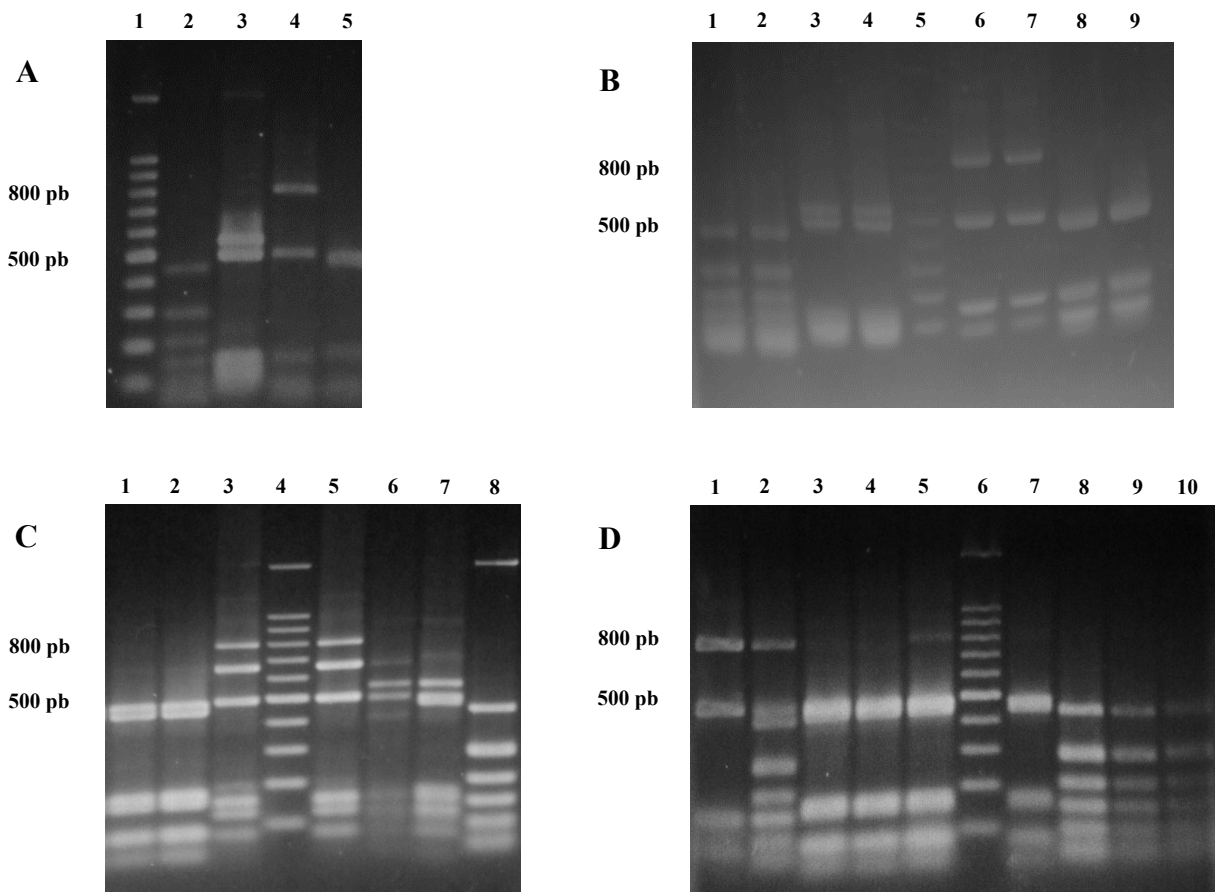

**S5 Fig. Restriction patterns of amplified gene encoding for 16S rRNA of bacterial strains isolated from plants.** (A) Restriction pattern of the amplified gene encoding for 16S rRNA using *MspI* of four reference strains used in the present work. 1) Molecular weight marker (100pb), 2) *A. brasilense* Sp7, 3) *P. putida* KT2440, 4) *Acinetobacter* sp. EMM02, 5) *Sphingomonas* sp. OF178. (B) Strains isolated from mono-inoculated plants (Exp. 1) and comparison with original strains. 1) Control *A. brasilense* Sp7. 2) Presumptive *A. brasilense* Sp7 strain-5 isolated on Selective Congo Red plates (SCRp). 3) Control *P. putida* KT2440. 4) Presumptive *P. putida* KT2440 strain-10 isolated on MM9- citrate plates (SMM9cp). 5) Molecular weight marker (100pb). 6) Control *Acinetobacter* sp. EMM02. 7) Presumptive *Acinetobacter* sp. EMM02 strain-20 isolated on Selective BAc plates (SBAc). 7 Control *Sphingomonas* sp. OF178. 9) Presumptive *Sphingomonas* sp. OF178 strain-22 isolated on Selective LB 5% (SLBp). (C) Strains isolated from multi-inoculated plants (Exp. 1). 1) Presumptive *Sphingomonas* sp. OF178 strain-35 isolated on SLBp. 2) Presumptive *Sphingomonas* sp. OF178 strain-30 isolated on SLBp. 3) Presumptive *Acinetobacter* sp. EMM02 strain-46 and Presumptive *P. putida* KT2440 isolated on SBAc. 4) Molecular weight marker (100pb). 5) Presumptive *Acinetobacter* sp. EMM02 strain-17 and Presumptive *P. putida* KT2440 isolated on SBAc. 6) Presumptive *P. putida* KT2440 strain-20 isolated on SMM9cp. 7) Presumptive *P. putida* KT2440 strain-28 isolated on SMM9cp. 8) Presumptive *A. brasilense* Sp7 strain-42 isolated on (SRCp). (D) Strains isolated from multi-inoculated plants (Exp. 2). 1) Presumptive *Acinetobacter* sp. EMM02 strain-41 isolated on SBAc. 2) Non-purified isolated presumptive as *Acinetobacter* sp. EMM02 strain-38 isolated on SBAc (Note: Pattern shows contamination with *A. brasilense* Sp7 strain). 3) Presumptive *Sphingomonas* sp. OF178 strain-49 isolated on SLBp. 4) Presumptive *Sphingomonas* sp. OF178 strain-21 isolated on SLBp. 5) Presumptive *Sphingomonas* sp. OF178 strain-18 isolated on SLBp. 6) Molecular weight marker (100pb). 7) Presumptive *Sphingomonas* sp. OF178 strain-19 isolated on SLBp. 8) Presumptive *A. brasilense* Sp7 strain-24 isolated on SCRp. 9) Presumptive *A. brasilense* Sp7 strain-28 isolated on SCRp. 10) Presumptive *A. brasilense* Sp7 strain-52 isolated on SCRp.
